# Supplementary material
Source: PubMed Central journal article supplement (PMC4782764)
Supplement: supp_kwv251_kwv251supp.pdf [file supp_kwv251_kwv251supp.pdf]

**Web Table 1.** Characteristics of the Sueño Sample Compared With the HCHS/SOL Cohort, 2010–2013\*

| Characteristic (Measured at Baseline HCHS/SOL Visit)                       | HCHS/SOL<br>( <i>n</i> = 16,415) | Sueño<br>( <i>n</i> = 2,086) |
|----------------------------------------------------------------------------|----------------------------------|------------------------------|
| Age, years; mean (SD)                                                      | 45.9 (13.9)                      | 45.0 (11.5)                  |
| Women; no. (%)                                                             | 9835 (60)                        | 1351 (65)                    |
| Self-reported sleep duration, hours/day; mean (SD)                         | 7.93 (1.42)                      | 7.82 (1.40)                  |
| Body mass index, kg/m <sup>2</sup> ; mean (SD)                             | 29.8 (6.1)                       | 29.9 (6.1)                   |
| 10-Item Center for Epidemiologic Studies Depression Scale; mean score (SD) | 7.3 (6.1)                        | 7.23 (6.16)                  |
| Apnea-hypopnea index; median score (interquartile range)                   | 1.9 (6.0)                        | 1.7 (5.2)                    |
| Epworth Sleepiness Scale; mean score (SD)                                  | 5.7 (4.8)                        | 5.7 (4.9)                    |
| Educational attainment; no. (%)                                            |                                  |                              |
| Less than high school                                                      | 6207 (38)                        | 664 (32)                     |
| High school graduate                                                       | 4180 (26)                        | 540 (26)                     |
| More than high school                                                      | 5937 (36)                        | 879 (42)                     |
| Annual household income; no. (%)                                           |                                  |                              |
| <\$30,000                                                                  | 10516 (64)                       | 1401 (67)                    |
| ≥\$30,000                                                                  | 4877 (30)                        | 5923 (28)                    |
| Did not report                                                             | 1022 (6)                         | 93 (4)                       |
| Employment status; no. (%)                                                 |                                  |                              |
| Employed, non-shift worker                                                 | 6640 (41)                        | 874 (42)                     |
| Shift worker                                                               | 1516 (9)                         | 186 (9)                      |
| Unemployed                                                                 | 7953 (49)                        | 1012 (49)                    |
| Ethnic heritage; no. (%)                                                   |                                  |                              |
| Cuban                                                                      | 2348 (14)                        | 376 (18)                     |
| Dominican                                                                  | 1473 (9)                         | 261 (13)                     |
| Mexican                                                                    | 6472 (40)                        | 561 (27)                     |
| Puerto Rican                                                               | 2728 (17)                        | 428 (21)                     |
| Central American                                                           | 1732 (11)                        | 284 (14)                     |
| South American                                                             | 1072 (7)                         | 176 (8)                      |
| Other/more than one heritage                                               | 503 (3)                          |                              |
| US nativity status                                                         |                                  |                              |
| Born in mainland US                                                        | 2863 (18)                        | 343 (17)                     |
| Born outside, lived in US ≥10 years                                        | 9626 (59)                        | 1197 (58)                    |
| Born outside, lived in US <10 years                                        | 3805 (23)                        | 539 (26)                     |
| English language preference at baseline interview; no. (%)                 | 3296 (20)                        | 424 (20)                     |
| Current drinker; no. (%)                                                   | 7750 (47)                        | 937 (45)                     |
| Current smoker; no. (%)                                                    | 3166 (19)                        | 402 (19)                     |
| Physical activity status                                                   |                                  |                              |
| High                                                                       | 1771 (11)                        | 184 (9)                      |
| Moderate                                                                   | 7203 (44)                        | 919 (44)                     |
| Low                                                                        | 7301 (45)                        | 979 (47)                     |

Abbreviations: HCHS/SOL, Hispanic Community Health Study/Study of Latinos; SD, standard deviation; US, United States.

\* Participants with apnea-hypopnea index ≥50 or age ≥65 years were not eligible to participate in Sueño.

**Web Table 2.** Actigraphy-Assessed Sleep Predicted by Self-Reported Sleep and Participant Characteristics in Sueño, 2010–2013 ( $n = 2,086$ )<sup>Y,¥</sup>

| Characteristic                                | Time Spent Asleep (min/day) <sup>1</sup> |                | Time Spent in Bed (min/day) <sup>2</sup> |                |
|-----------------------------------------------|------------------------------------------|----------------|------------------------------------------|----------------|
|                                               | Partial $R^2$                            | $\beta$ (SE)   | Partial $R^2$                            | $\beta$ (SE)   |
| Intercept                                     | —                                        | 428.99 (4.99)  | —                                        | 473.16 (5.59)  |
| Self-reported sleep centered at 480 min/day   | 0.18                                     | 0.33 (0.02)*   | 0.23                                     | 0.40 (0.02)*   |
| Male sex                                      | 0.02                                     | -11.03 (2.56)* | 0                                        | -6.83 (2.87)*  |
| Age 18–44 years                               | 0                                        | -3.33 (2.60)   | 0                                        | -1.96 (2.92)   |
| Body mass index category                      |                                          |                |                                          |                |
| Overweight                                    | 0                                        | -2.55 (3.16)   | 0                                        | -2.98 (3.54)   |
| Obese I (30–<35)                              | 0                                        | -2.74 (3.49)   | 0                                        | -3.69 (3.91)   |
| Obese II (35–<40)                             | 0                                        | -10.94 (4.24)* | 0                                        | -12.31 (4.75)* |
| Obese III ( $\geq 40$ )                       | 0                                        | -13.57 (5.25)* | 0                                        | -15.40 (5.89)* |
| Insomnia Severity Index                       |                                          |                |                                          |                |
| Subthreshold insomnia                         | 0                                        | 10.16 (2.88)*  | 0                                        | 12.91 (3.22)*  |
| Moderate insomnia                             | 0                                        | 5.36 (3.86)    | 0                                        | 10.60 (4.32)*  |
| Severe insomnia                               | 0                                        | 21.55 (6.12)*  | 0.01                                     | 30 (6.86)*     |
| Apnea-hypopnea index score <sup>3</sup>       |                                          |                |                                          |                |
| >5–<15 (mild sleep apnea)                     | 0                                        | -5.80 (3.04)   | 0                                        | -4.89 (3.41)   |
| >15 (moderate or more severe sleep apnea)     | 0                                        | -2.18 (4.22)   | 0                                        | 2.60 (4.73)    |
| Epworth Sleepiness Scale score $\geq 10$      | 0.02                                     | -17.29 (2.97)* | 0.01                                     | -19.28 (3.33)* |
| Sleep efficiency <85%                         | 0.08                                     | -35.69 (2.45)* | 0                                        | 7.59 (2.74)*   |
| Sleep medication use $\geq 1$ –2 times/week   | 0                                        | 11 (3.48)*     | 0                                        | 11.68 (3.90)*  |
| Employment status                             |                                          |                |                                          |                |
| Shift worker                                  | 0                                        | -8.68 (3.50)*  | 0                                        | -10.06 (3.92)* |
| Unemployed                                    | 0                                        | 7.35 (2.61)*   | 0                                        | 10.21 (2.93)*  |
| Educational attainment <sup>3</sup>           |                                          |                |                                          |                |
| Less than high school or GED                  | 0                                        | 2.76 (2.76)    | 0                                        | 3.18 (3.10)    |
| At least high school or GED                   | 0                                        | 2.07 (2.81)    | 0                                        | 3.07 (3.15)    |
| Ethnic background                             |                                          |                |                                          |                |
| Cuban                                         | 0                                        | -4.94 (3.77)   | 0                                        | -3.51 (4.23)   |
| Dominican                                     | 0                                        | -2.31 (3.92)   | 0                                        | -0.14 (4.39)   |
| Puerto Rican                                  | 0                                        | -5.04 (3.75)   | 0                                        | -2.40 (4.20)   |
| Central American                              | 0                                        | -7.84 (3.84)*  | 0                                        | -6.34 (4.30)   |
| South American                                | 0                                        | -9.50 (4.57)*  | 0                                        | -8.30 (5.12)   |
| US-born status <sup>3</sup>                   |                                          |                |                                          |                |
| Born in mainland US                           | 0                                        | -1.01 (4.67)   | 0                                        | 0.02 (5.24)    |
| Born outside US, lived in US $\geq 10$ years  | 0                                        | 3.02 (2.90)    | 0                                        | 3.99 (3.25)    |
| English language preference <sup>3</sup>      | 0                                        | 0.11 (3.78)    | 0                                        | 1.24 (4.24)    |
| Depression symptoms, CES-D-10 score $\geq 10$ | 0                                        | 1.83 (2.79)    | 0                                        | 2.55 (3.13)    |
| Caffeinated beverage intake $\geq 3$ cups/day | 0                                        | -0.72 (2.42)   | 0                                        | -0.75 (2.71)   |
| Current smoker                                | 0                                        | -8.47 (3.07)*  | 0                                        | -7.95 (3.44)*  |
| Current drinker                               | 0                                        | -5.74 (2.43)*  | 0                                        | -5.23 (2.73)   |

(Table continues)

**Web Table 2.** Actigraphy-Assessed Sleep Predicted by Self-Reported Sleep and Participant Characteristics in Sueño, 2010–2013 ( $n = 2,086$ )<sup>Y,¥</sup>

| Characteristic                       | Time Spent Asleep (min/day) <sup>1</sup> |              | Time Spent in Bed (min/day) <sup>2</sup> |              |
|--------------------------------------|------------------------------------------|--------------|------------------------------------------|--------------|
|                                      | Partial $R^2$                            | $\beta$ (SE) | Partial $R^2$                            | $\beta$ (SE) |
| Physical activity level <sup>3</sup> |                                          |              |                                          |              |
| High                                 | 0                                        | 4.09 (4.28)  | 0                                        | 5.20 (4.80)  |
| Moderate                             | 0                                        | 1.49 (2.38)  | 0                                        | 1.88 (2.67)  |
| Full model $R^2$                     | 0.32                                     |              | 0.30                                     |              |
| Root mean squared error              | 50.75                                    |              | 56.88                                    |              |

Abbreviations: AHI, apnea-hypopnea index; CES-D-10, 10-item Center for Epidemiologic Studies Depression Scale; ESS, Epworth Sleepiness Scale; GED, General Educational Development; SE, standard error; US, United States.

\* Asterisks indicates statistically significant predictors of actigraphy-assessed sleep time at the  $P < 0.05$  level.

<sup>Y</sup> Each column (time asleep and time in bed) represents a separate statistical model, adjusted for all variables in the column.

<sup>¥</sup> Reference categories are: female sex; age 18–44 years; normal or underweight; no clinical insomnia; AHI 0–5, no sleep apnea; ESS score <10; sleep medication use <1–2 times/week; employed non-shift worker;  $\geq$ GED or high school; Mexican; born outside US, lived in US <10 years; Spanish language preference; CES-D-10 score <10, no clinical depressive symptoms; <3 cups/day caffeinated beverages; current nonsmoker; current nondrinker; and low physical activity level.

<sup>1</sup> “Time asleep” indicates that the time spent asleep during the main rest period is the actigraphy-assessed outcome for the model.

<sup>2</sup> “Time in bed” indicates that total duration of the main rest period is the actigraphy-assessed outcome for the model.

<sup>3</sup> Variable was measured at baseline study visit rather than at the Sueño ancillary study visit.

**Web Figure 1.** Prediction of Tertiles of Actigraphy-Assessed Sleep Duration Given Tertiles of Self-Reported Sleep Duration in Sueño, 2010–2013: ROC Curves With/Without Covariate Adjustment

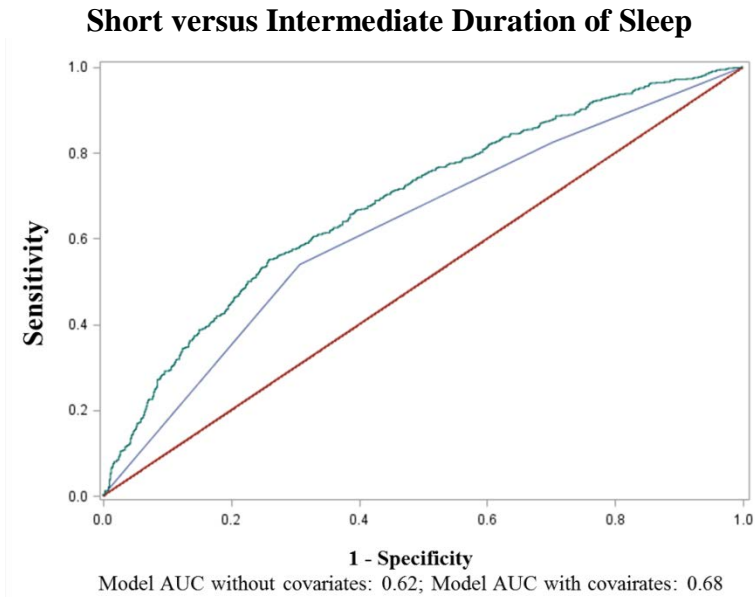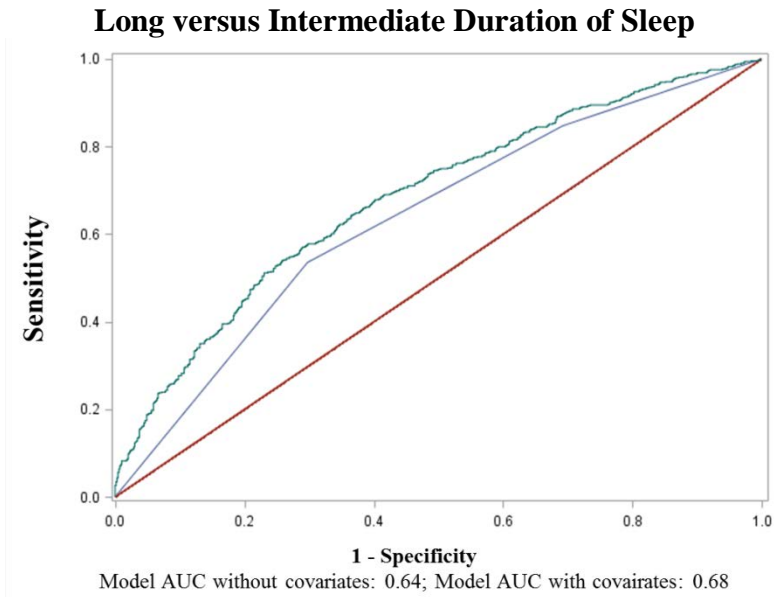

Abbreviations: AUC, area under the ROC curve; ROC, receiver operating characteristic.
